# Psychiatric Services

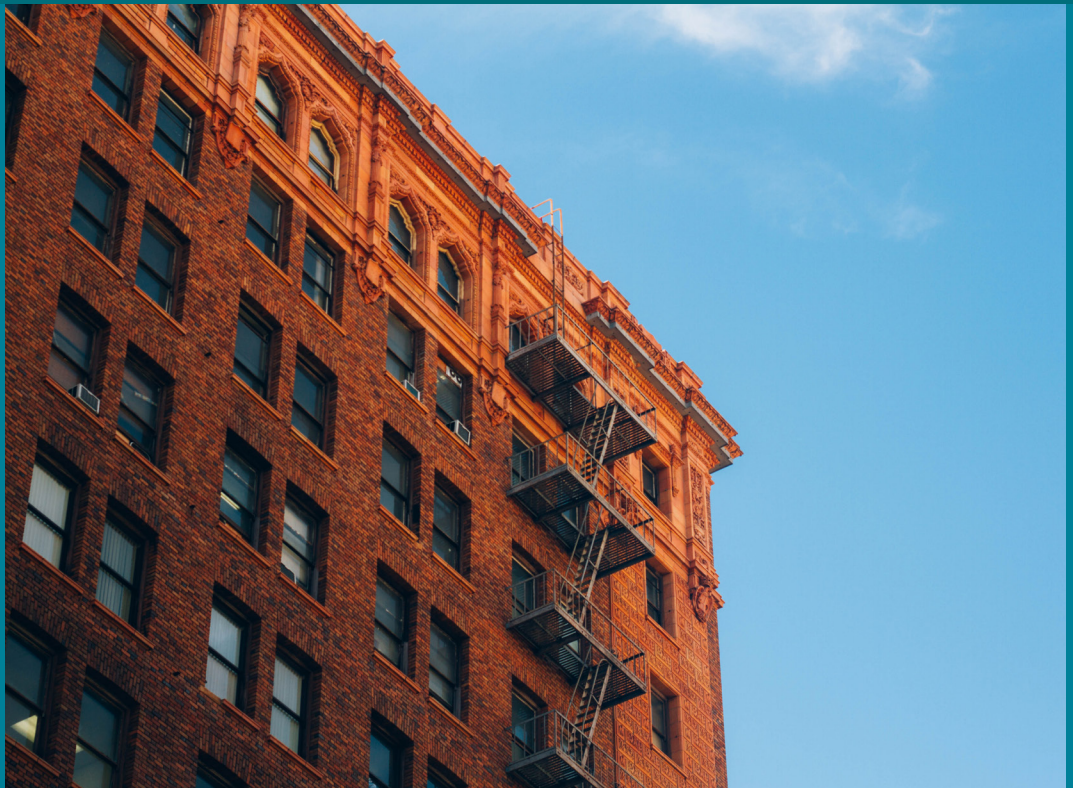

Trajectories of shelter use after receipt of Housing First services

Improving prescribing of psychoactive medications for children

Open Forum: Do contact-based interventions reduce stigma and discrimination?

Personal Account: Leading a clinical service through COVID-19
